# Supplementary material
Source: MDPI journal article supplement (https://www.mdpi.com/2072-4292/14/15/3675)
Supplement: s1 [file s1 › remotesensing-1732254-supplementary.pdf]

## Supplementary

**Table S1.** Statistical metrics used for evaluating multiple precipitation products.

| Functions                                                                                                                                                                                    | Unit | Description                                                                                                          |
|----------------------------------------------------------------------------------------------------------------------------------------------------------------------------------------------|------|----------------------------------------------------------------------------------------------------------------------|
| $CC = \frac{\sum_{t=1}^n (P_{o,t} - \overline{P_o})(P_{s,t} - \overline{P_s})}{\sqrt{\sum_{t=1}^n (P_{o,t} - \overline{P_o})^2} \sqrt{\sum_{t=1}^n (P_{s,t} - \overline{P_s})^2}} \quad (7)$ | /    | $P_{s,t}$ is the satellite precipitation in time step t<br>$P_{o,t}$ is the observation precipitation in time step t |
| $RMSE = \sqrt{\frac{1}{n} \sum_{t=1}^n (P_{o,t} - P_{s,t})^2} \quad (8)$                                                                                                                     | mm   | n is the total number of days in the evaluation period                                                               |
| $Bias = \frac{\sum_{t=1}^n (P_{s,t} - P_{o,t})}{\sum_{t=1}^n P_{o,t}} \quad (9)$                                                                                                             | /    | $\overline{P_s} = \frac{1}{n} \sum_{t=1}^n P_{s,t}$ , $\overline{P_o} = \frac{1}{n} \sum_{t=1}^n P_{o,t}$            |
| $POD = H / (H + M) \quad (10)$                                                                                                                                                               | /    | H is the observed precipitation correctly detected                                                                   |
| $FAR = F / (F + H) \quad (11)$                                                                                                                                                               | /    | M is the observed precipitation not detected                                                                         |
| $CSI = H / (F + H + M) \quad (12)$                                                                                                                                                           | /.   | F is the precipitation detected but not observed                                                                     |

**Table S2.** Calibration parameter and their intervals (N: nontransformed mode and T: transformed mode).

|             | Binf(N/A) |       | Ds(fraction) |       | Dsmax(mm/day) |       | Ws(fraction) |      | D1(m)       |      | D2(m)      |      | D3(m)      |      |
|-------------|-----------|-------|--------------|-------|---------------|-------|--------------|------|-------------|------|------------|------|------------|------|
|             | (0-0.4)   |       | (0-1)        |       | (0-30)        |       | (0-1)        |      | (0.05-0.25) |      | (0.25-2.5) |      | (0.25-2.5) |      |
|             | N         | T     | N            | T     | N             | T     | N            | T    | N           | T    | N          | T    | N          | T    |
| CPC         | 0.38      | 0.12  | 0.25         | 0.31  | 4.9           | 6.22  | 0.001        | 0.53 | 0.16        | 0.11 | 2.17       | 1.05 | 0.8        | 1.04 |
| CDR         | 0.33      | 0.007 | 0.71         | 0.017 | 17.99         | 8.06  | 0.007        | 0.44 | 0.05        | 0.10 | 0.72       | 0.61 | 0.71       | 0.35 |
| CCS-<br>CDR | 0.27      | 0.016 | 0.62         | 0.33  | 15.69         | 14.76 | 0.002        | 0.29 | 0.05        | 0.14 | 0.51       | 1.18 | 0.74       | 1.71 |
| CCS         | 0.37      | 0.32  | 0.67         | 0.46  | 22.58         | 16.65 | 0.3          | 0.26 | 0.07        | 0.11 | 0.26       | 1.42 | 0.9        | 1.14 |
| PDIR        | 0.11      | 0.16  | 0.86         | 0.29  | 18.32         | 2.48  | 0.56         | 0.36 | 0.15        | 0.12 | 1.98       | 2.25 | 0.98       | 0.44 |

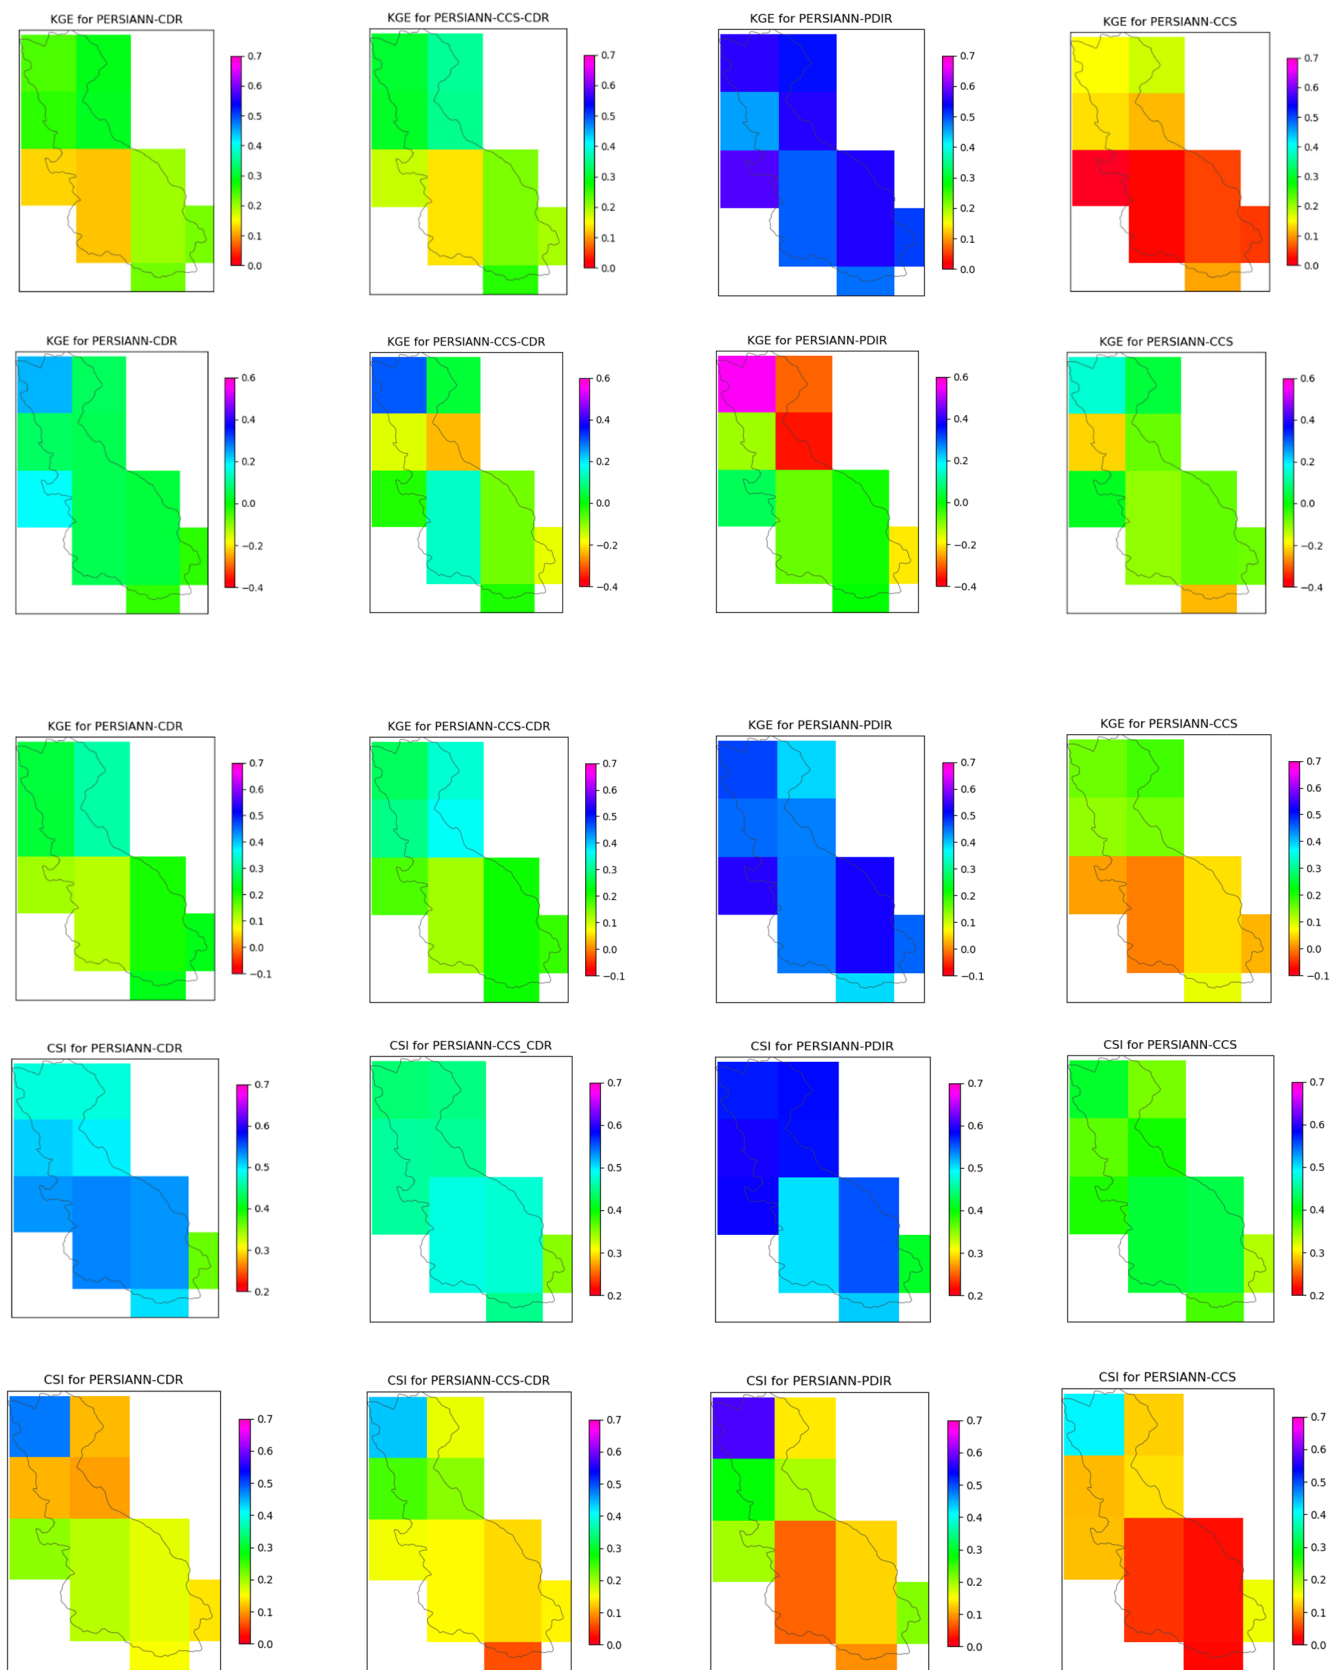

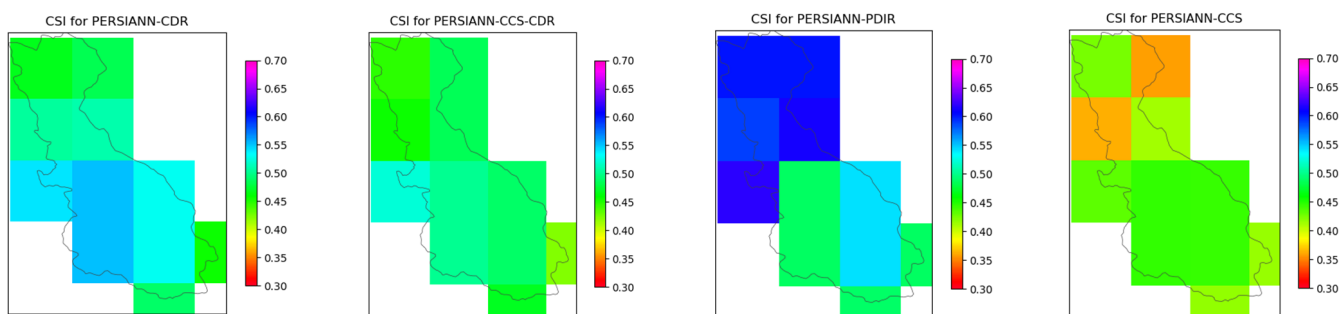

**Figure S1.** Distribution of PERIANN family precipitation datasets' performance against CPC according to  $E_{KGE}$  (rows 1 to 3 = daily, summer, and winter, respectively) and CSI (row 4 to 6 = daily, summer and winter, respectively). CDR, CCS-CDR, PDIR, and CCS: columns 1 to 5.

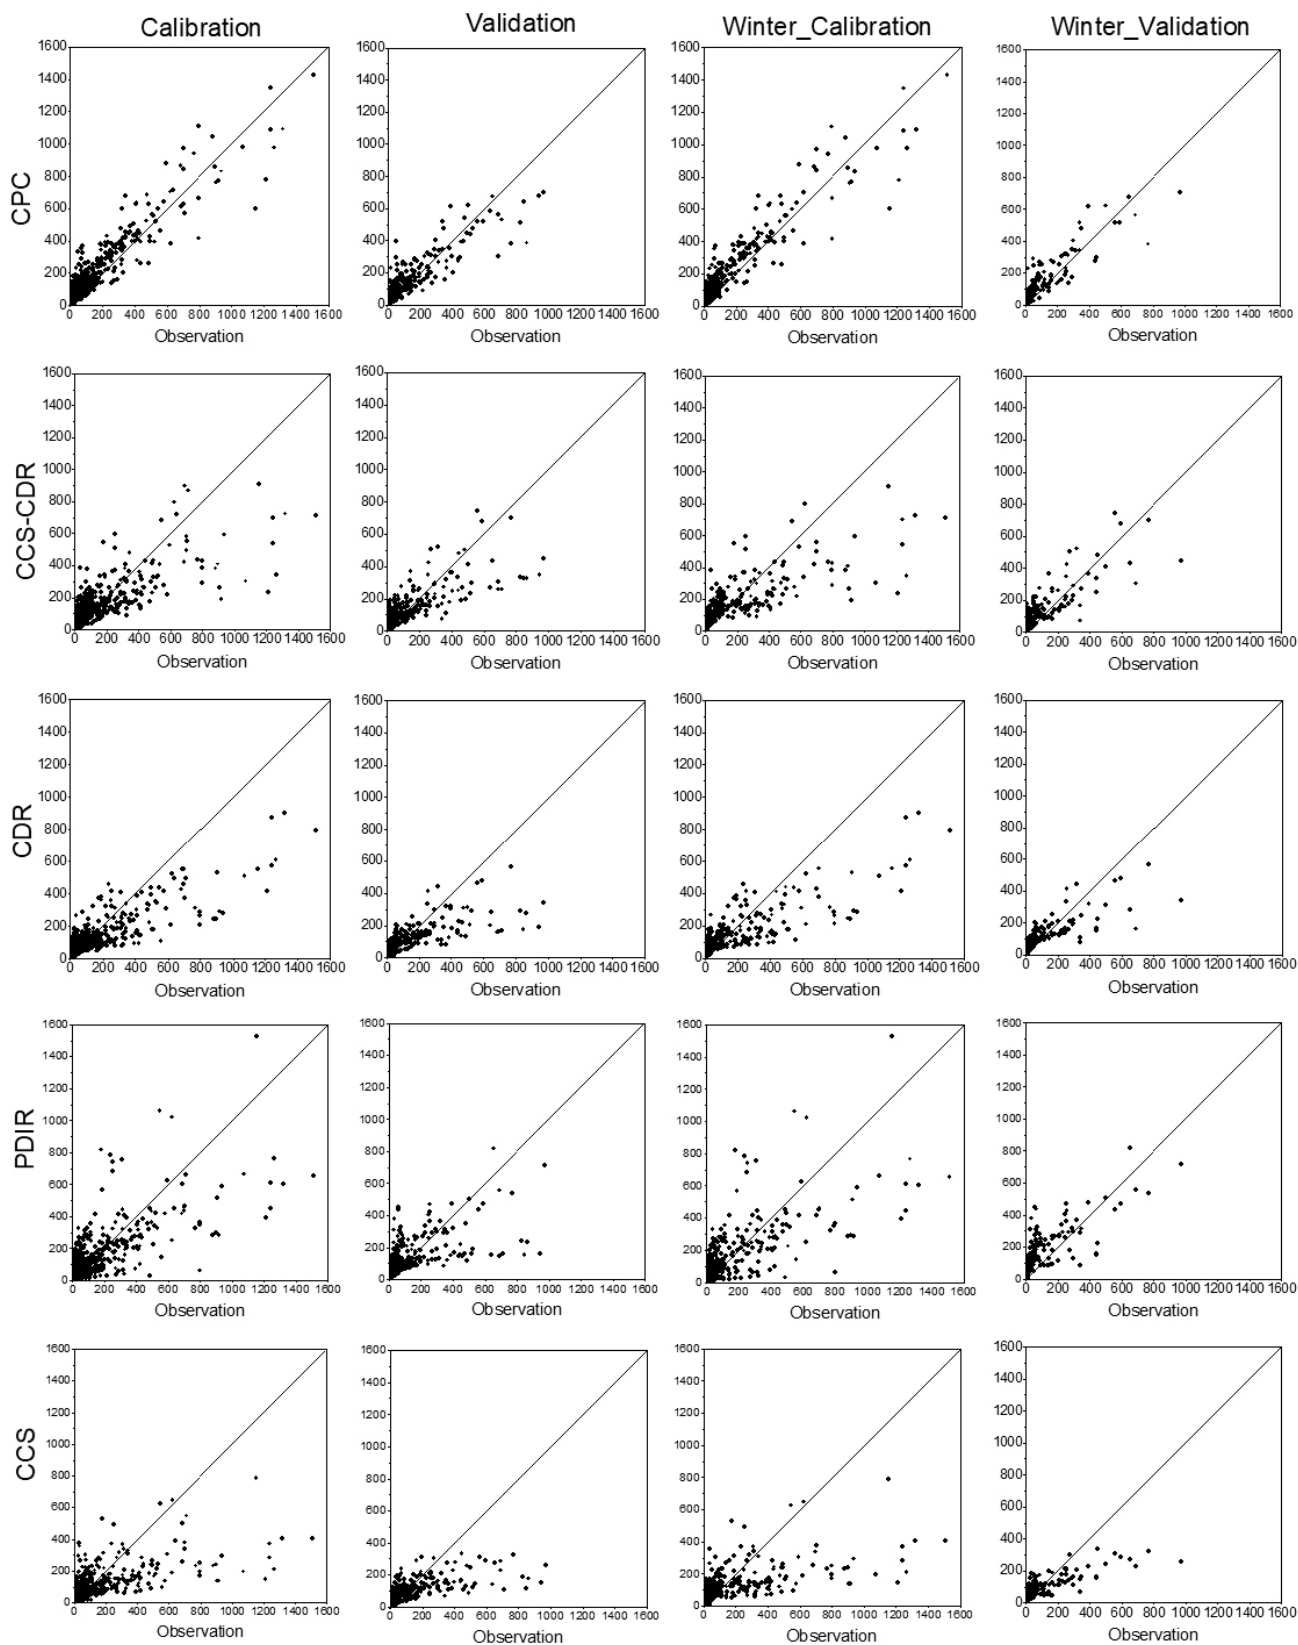

**Figure S2.** Scatter plots of daily streamflow generated from CPC and the PERSIANN family. The horizontal axis is observation discharge ( $\text{m}^3/\text{s}$ ), and the vertical axis is simulated discharge ( $\text{m}^3/\text{s}$ ).

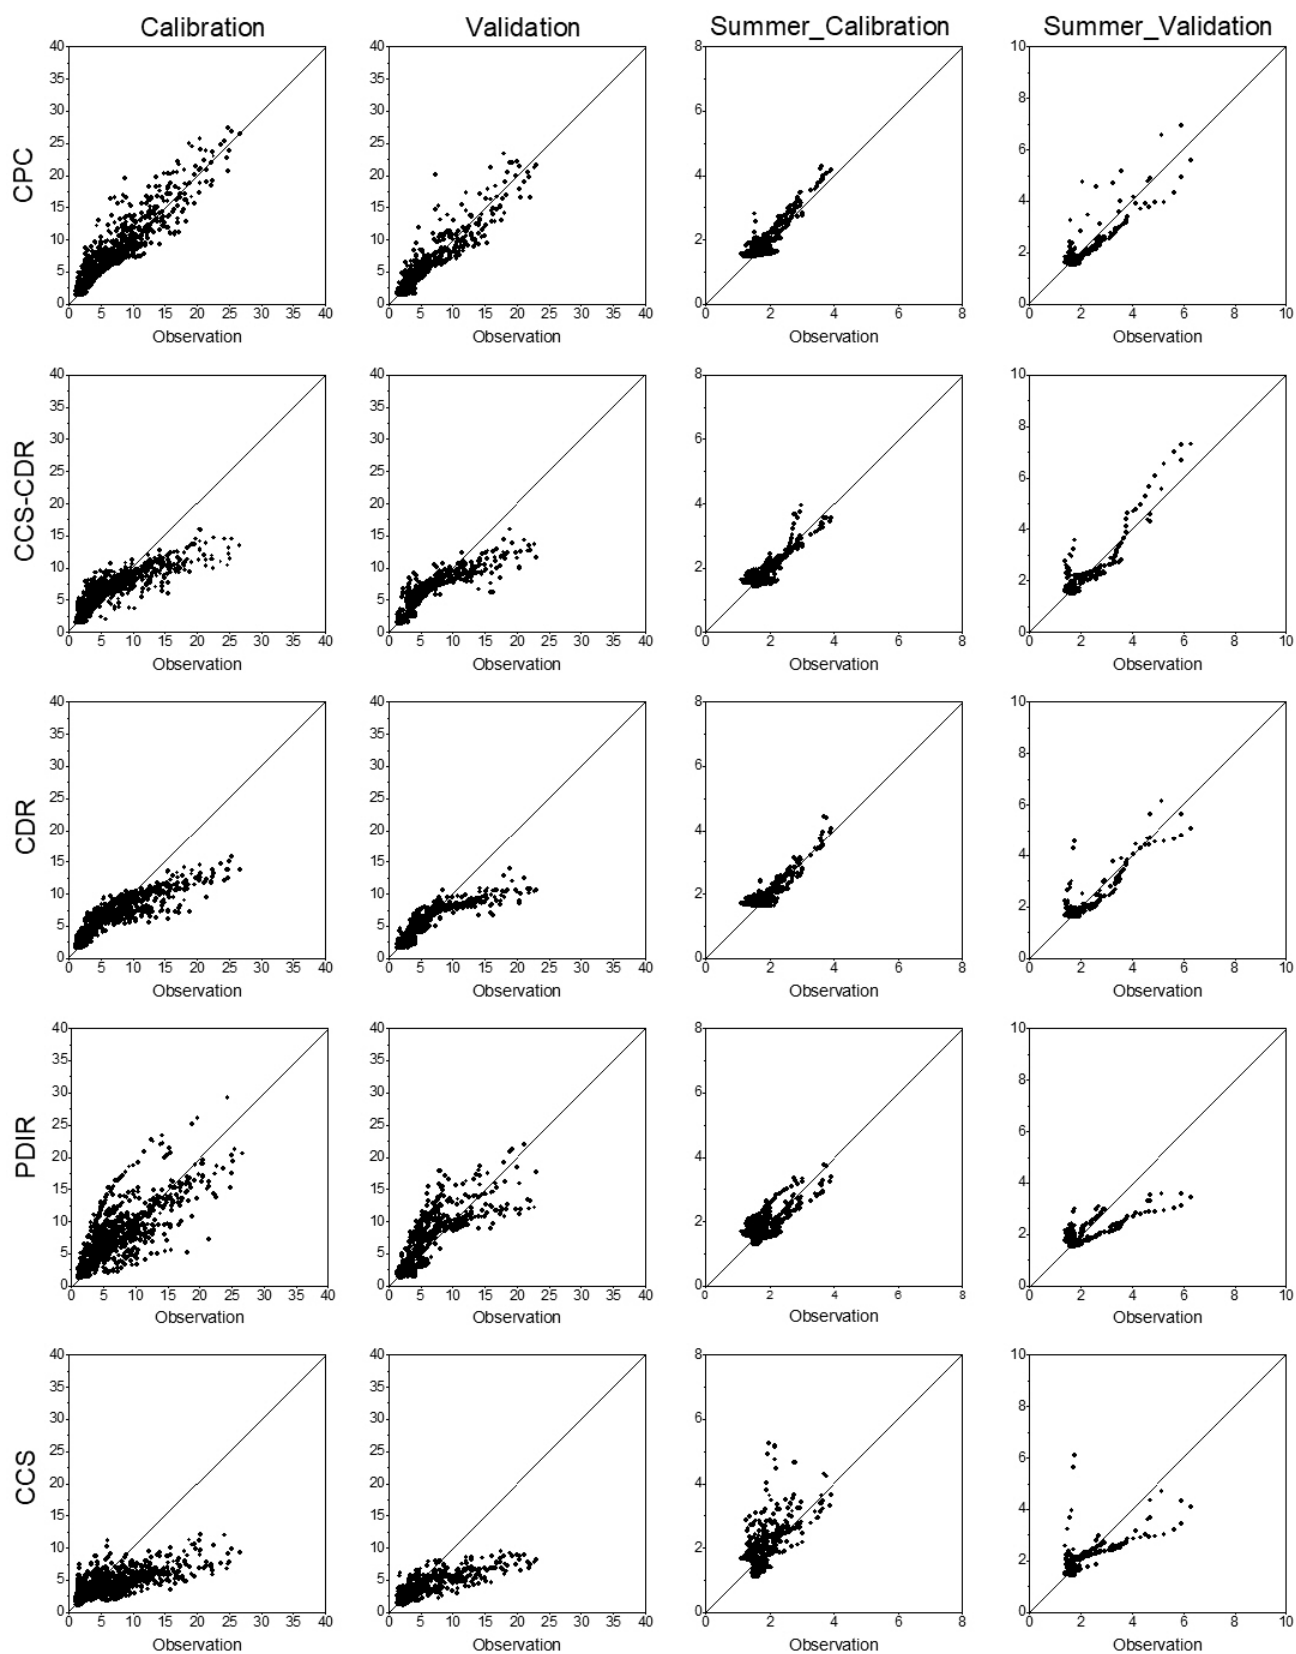

**Figure S3.** Scatter plots of transformed daily streamflow generated from CPC and the PERSIANN family. The horizontal axis is observation discharge ( $\text{m}^3/\text{s}$ ), and the vertical axis is simulated discharge ( $\text{m}^3/\text{s}$ ).

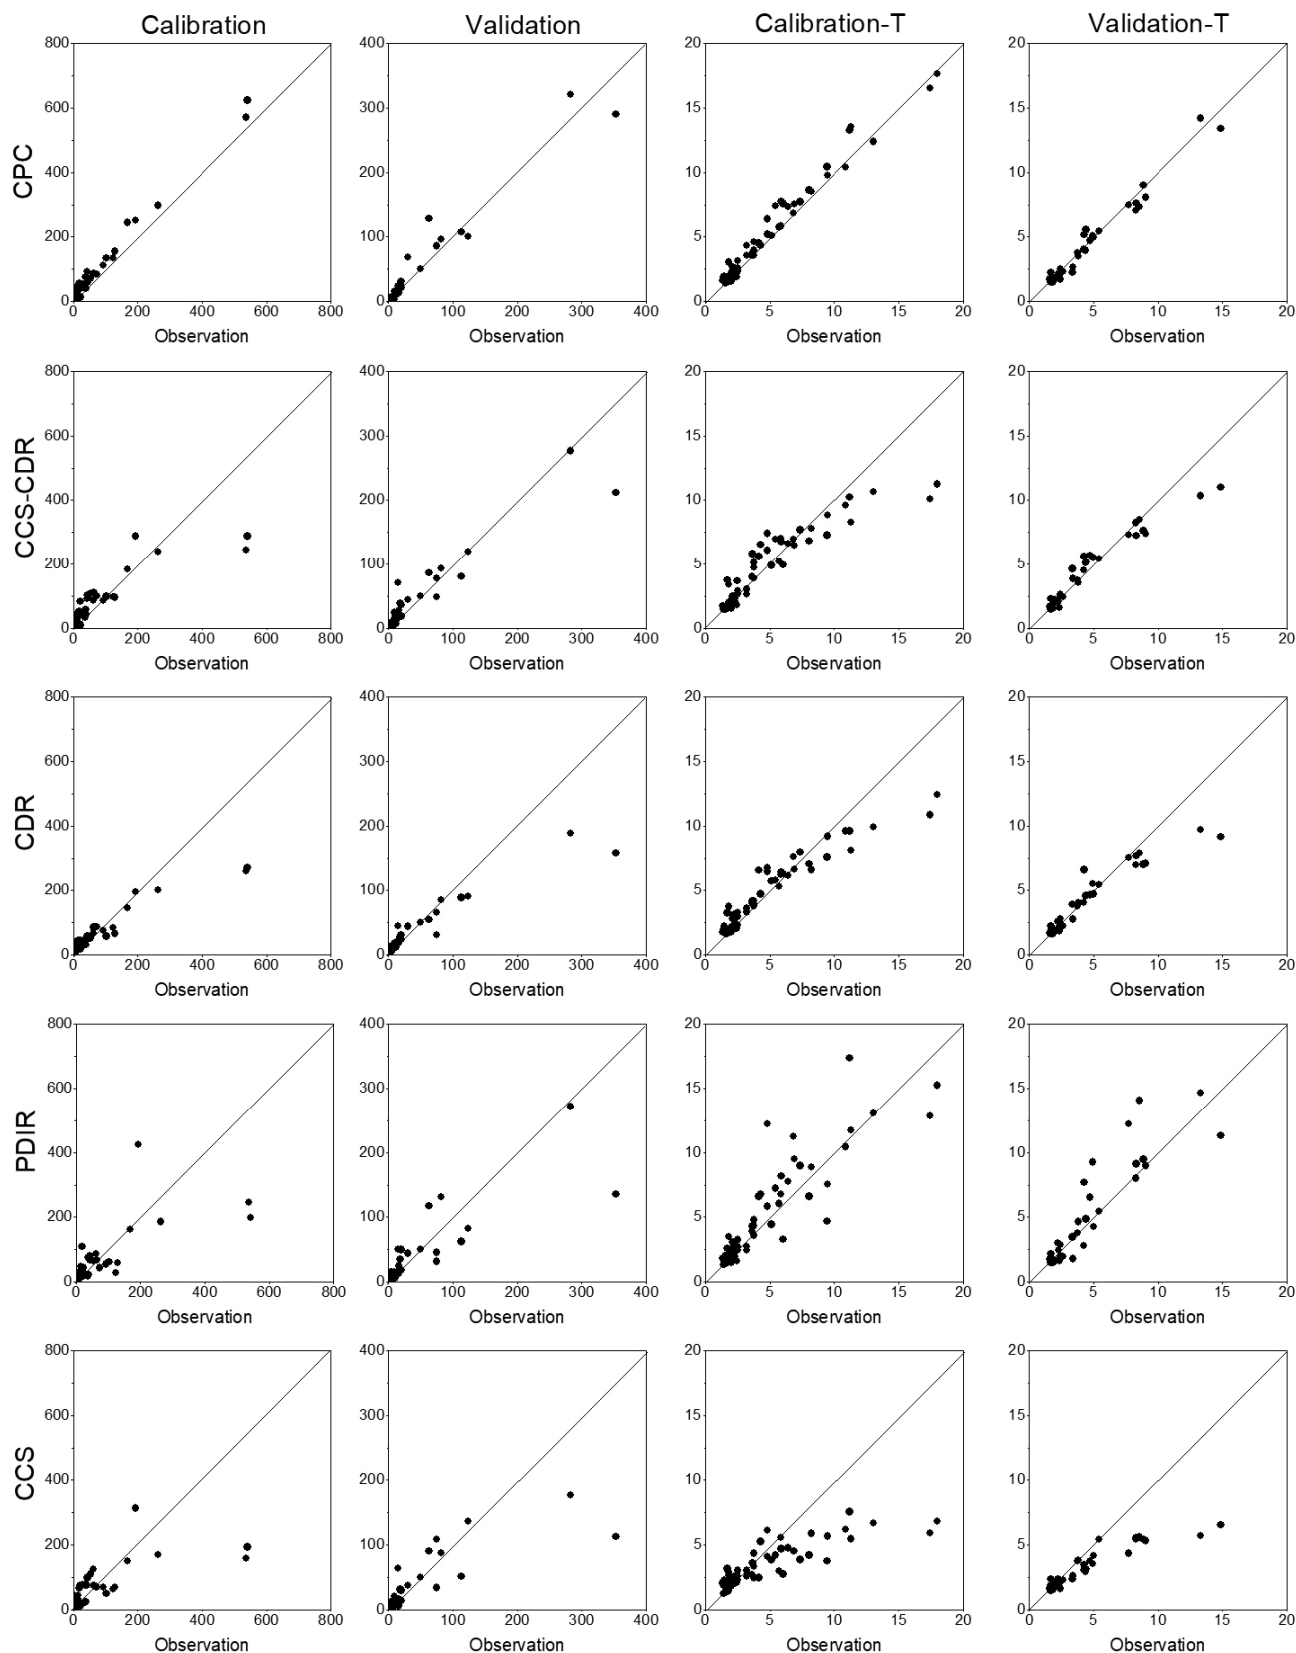

**Figure S4.** Scatter plots of monthly streamflow for the general (column 1 and 2) and transformed (column 3 and 4) datasets generated from CPC and the PERSIANN family. The horizontal axis is observation discharge, and the vertical axis is simulated discharge.

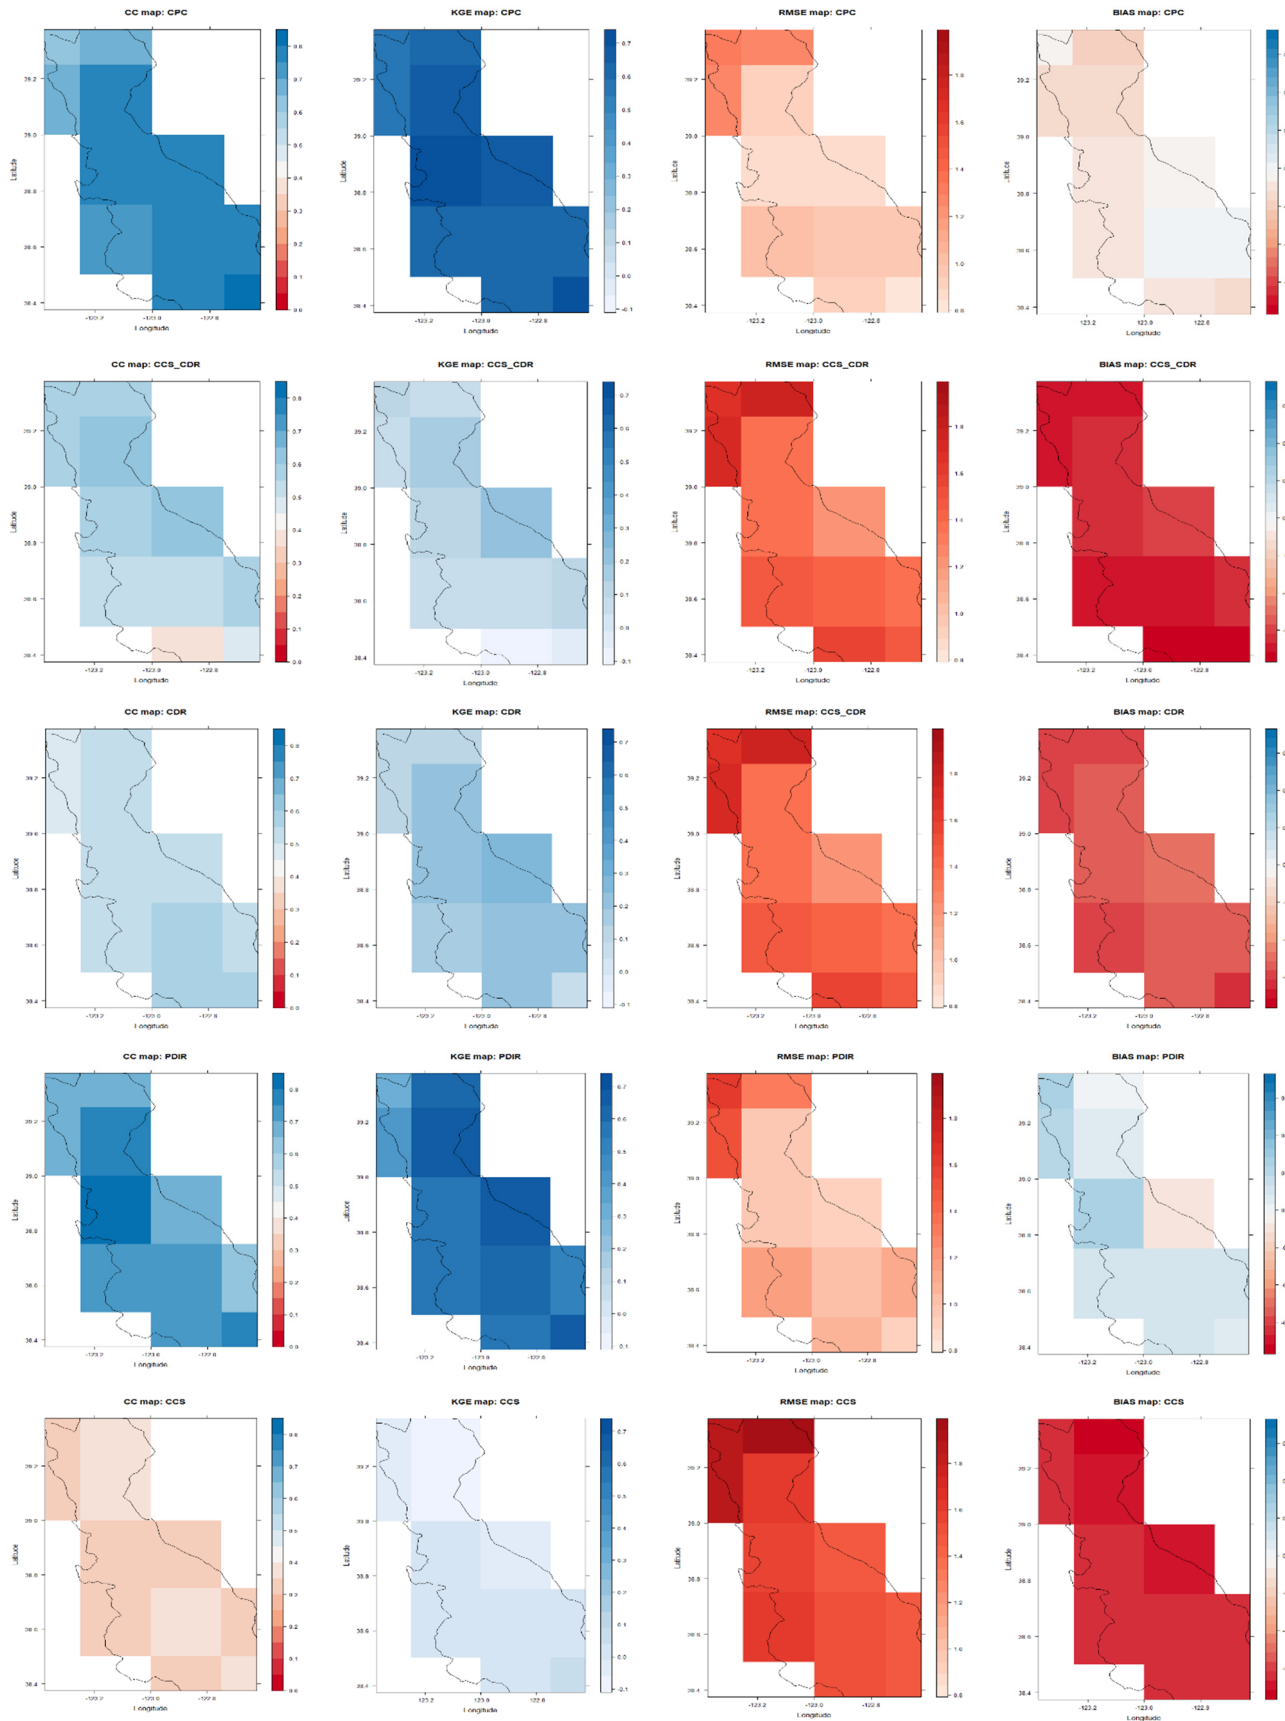

**Figure S5.** CC,  $E_{KGE}$ , RMSE, and Bias (columns 1 to 4) for CPC, CCS-CDR, CDR, PDIR, and CCS (rows 1 to 5), over the Russian River catchment for ET simulation.

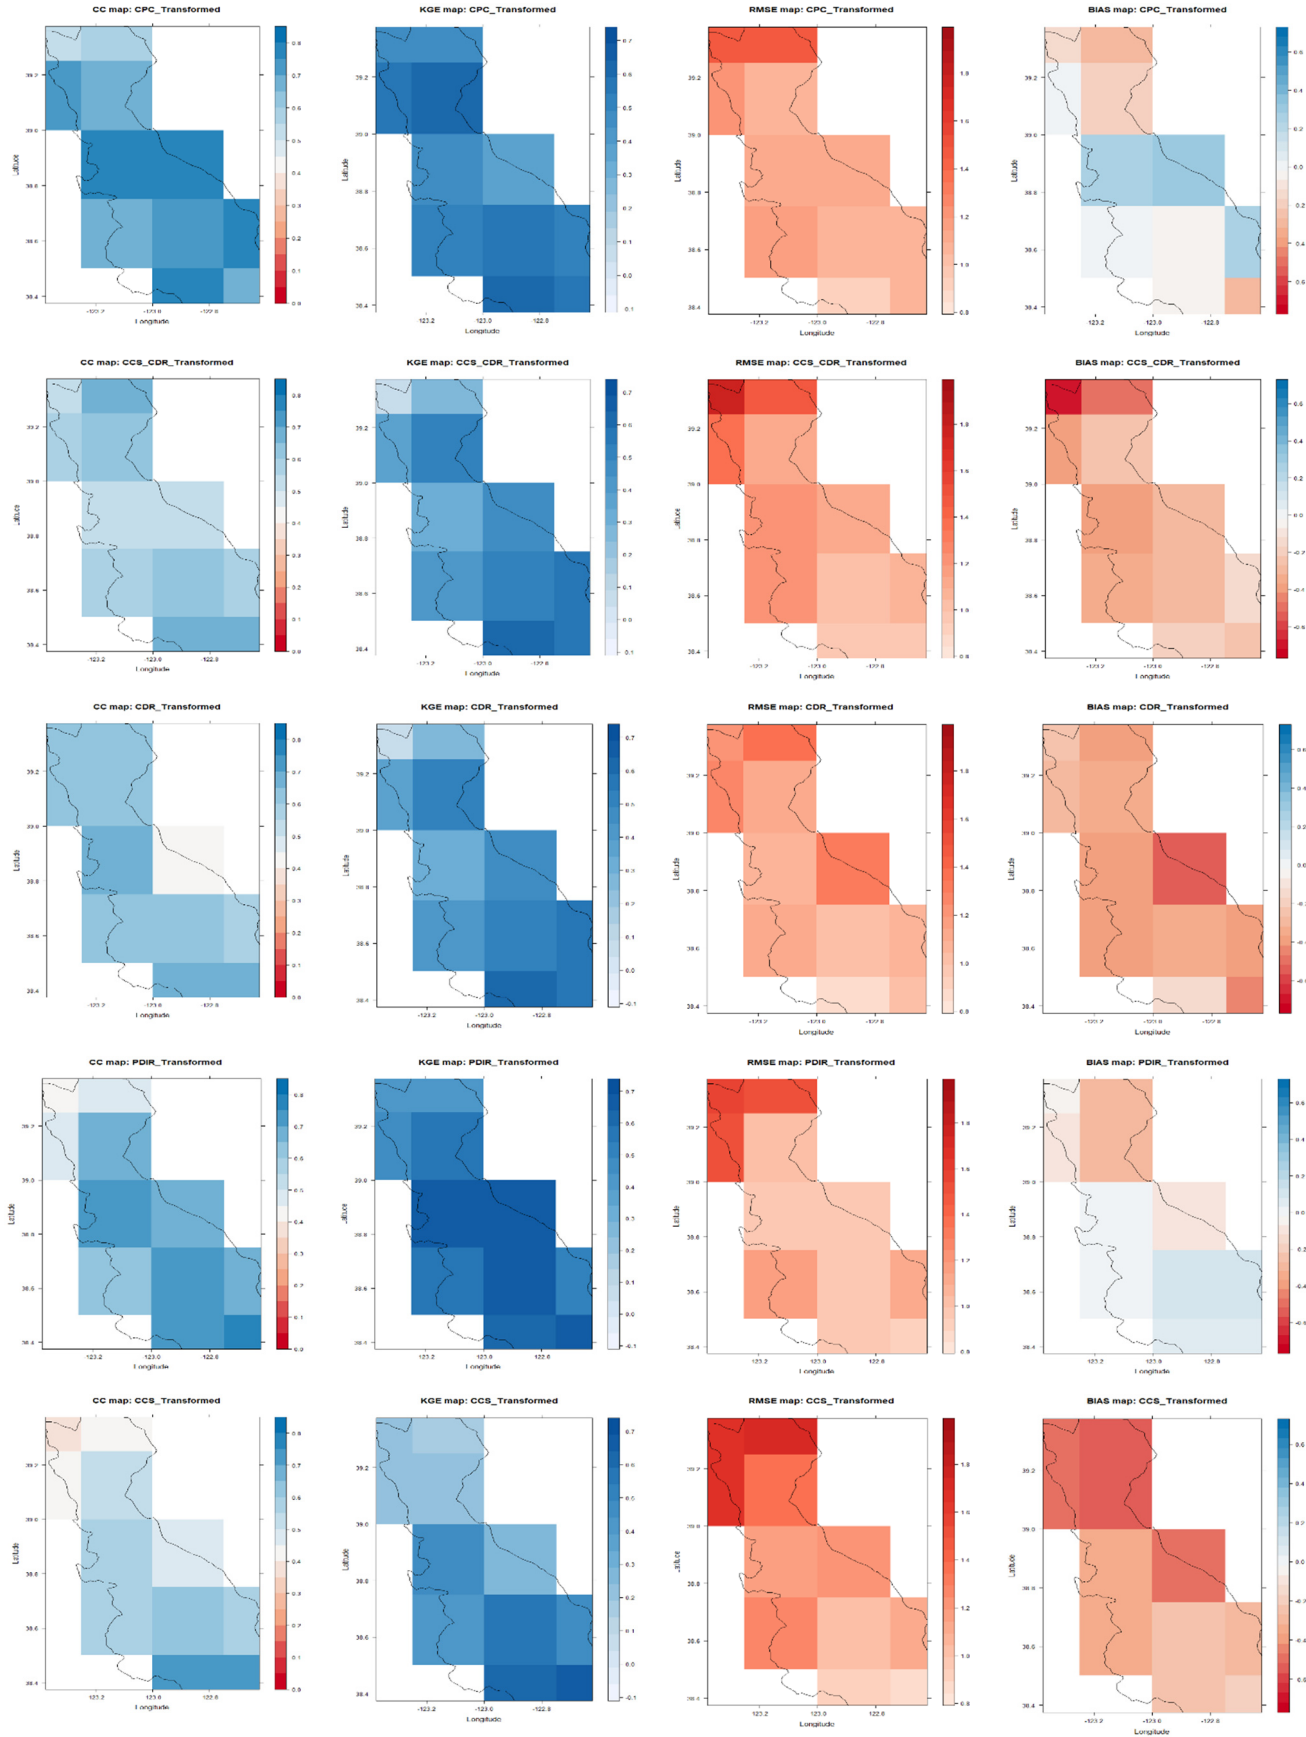

**Figure S6.** CC,  $E_{KGE}$ , RMSE, and Bias (column 1 to 4) for CPC-T, CCS-CDR-T, CDR-T, PDIR-T, and CCS-T (rows 1 to 5) over the Russian River catchment for ET simulation.

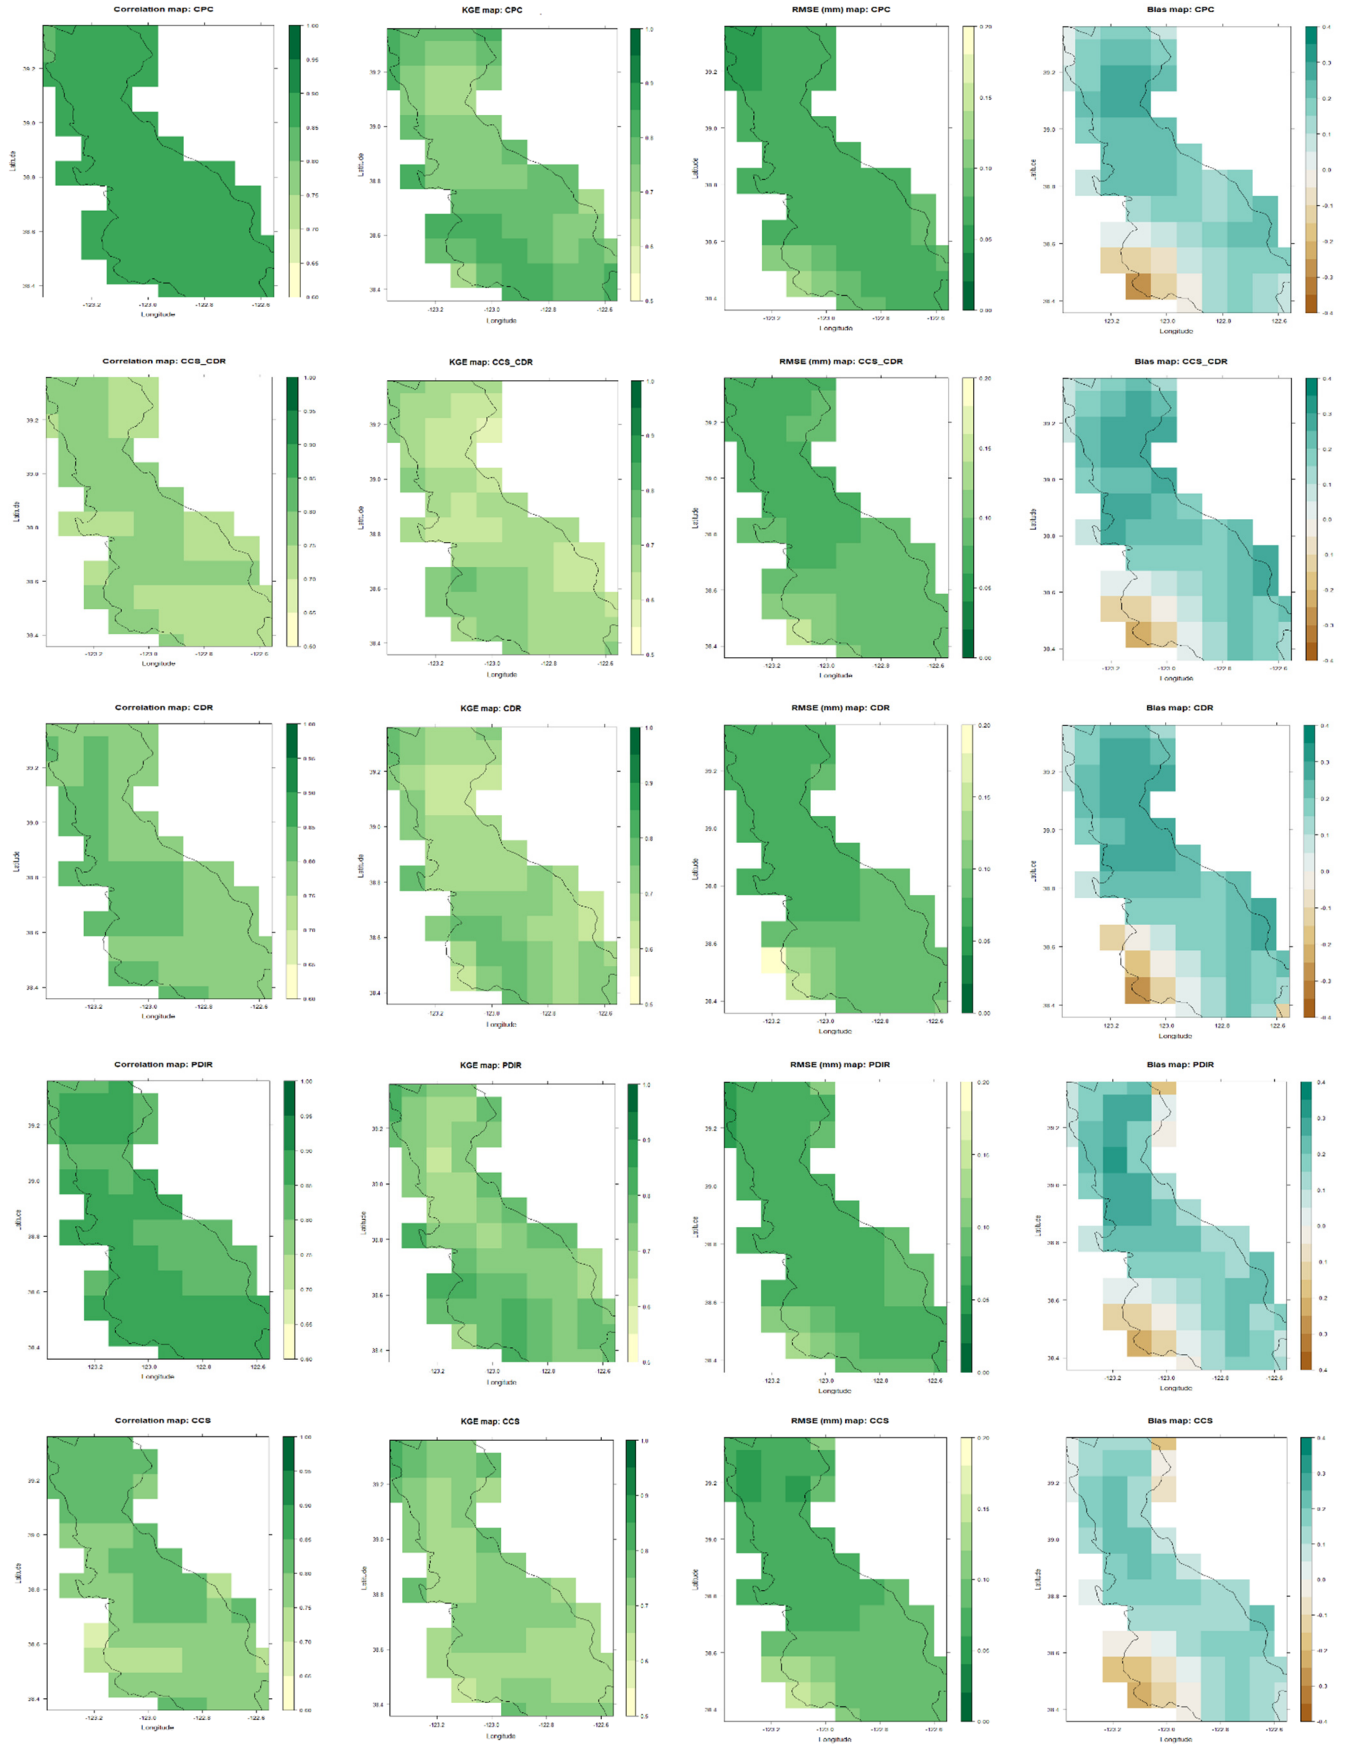

**Figure S7.** CC,  $E_{KGE}$ , RMSE, and Bias (columns 1 to 4) for CPC, CCS-CDR, CDR, PDIR, and CCS (rows 1 to 5) over the Russian River catchment for soil moisture simulation.

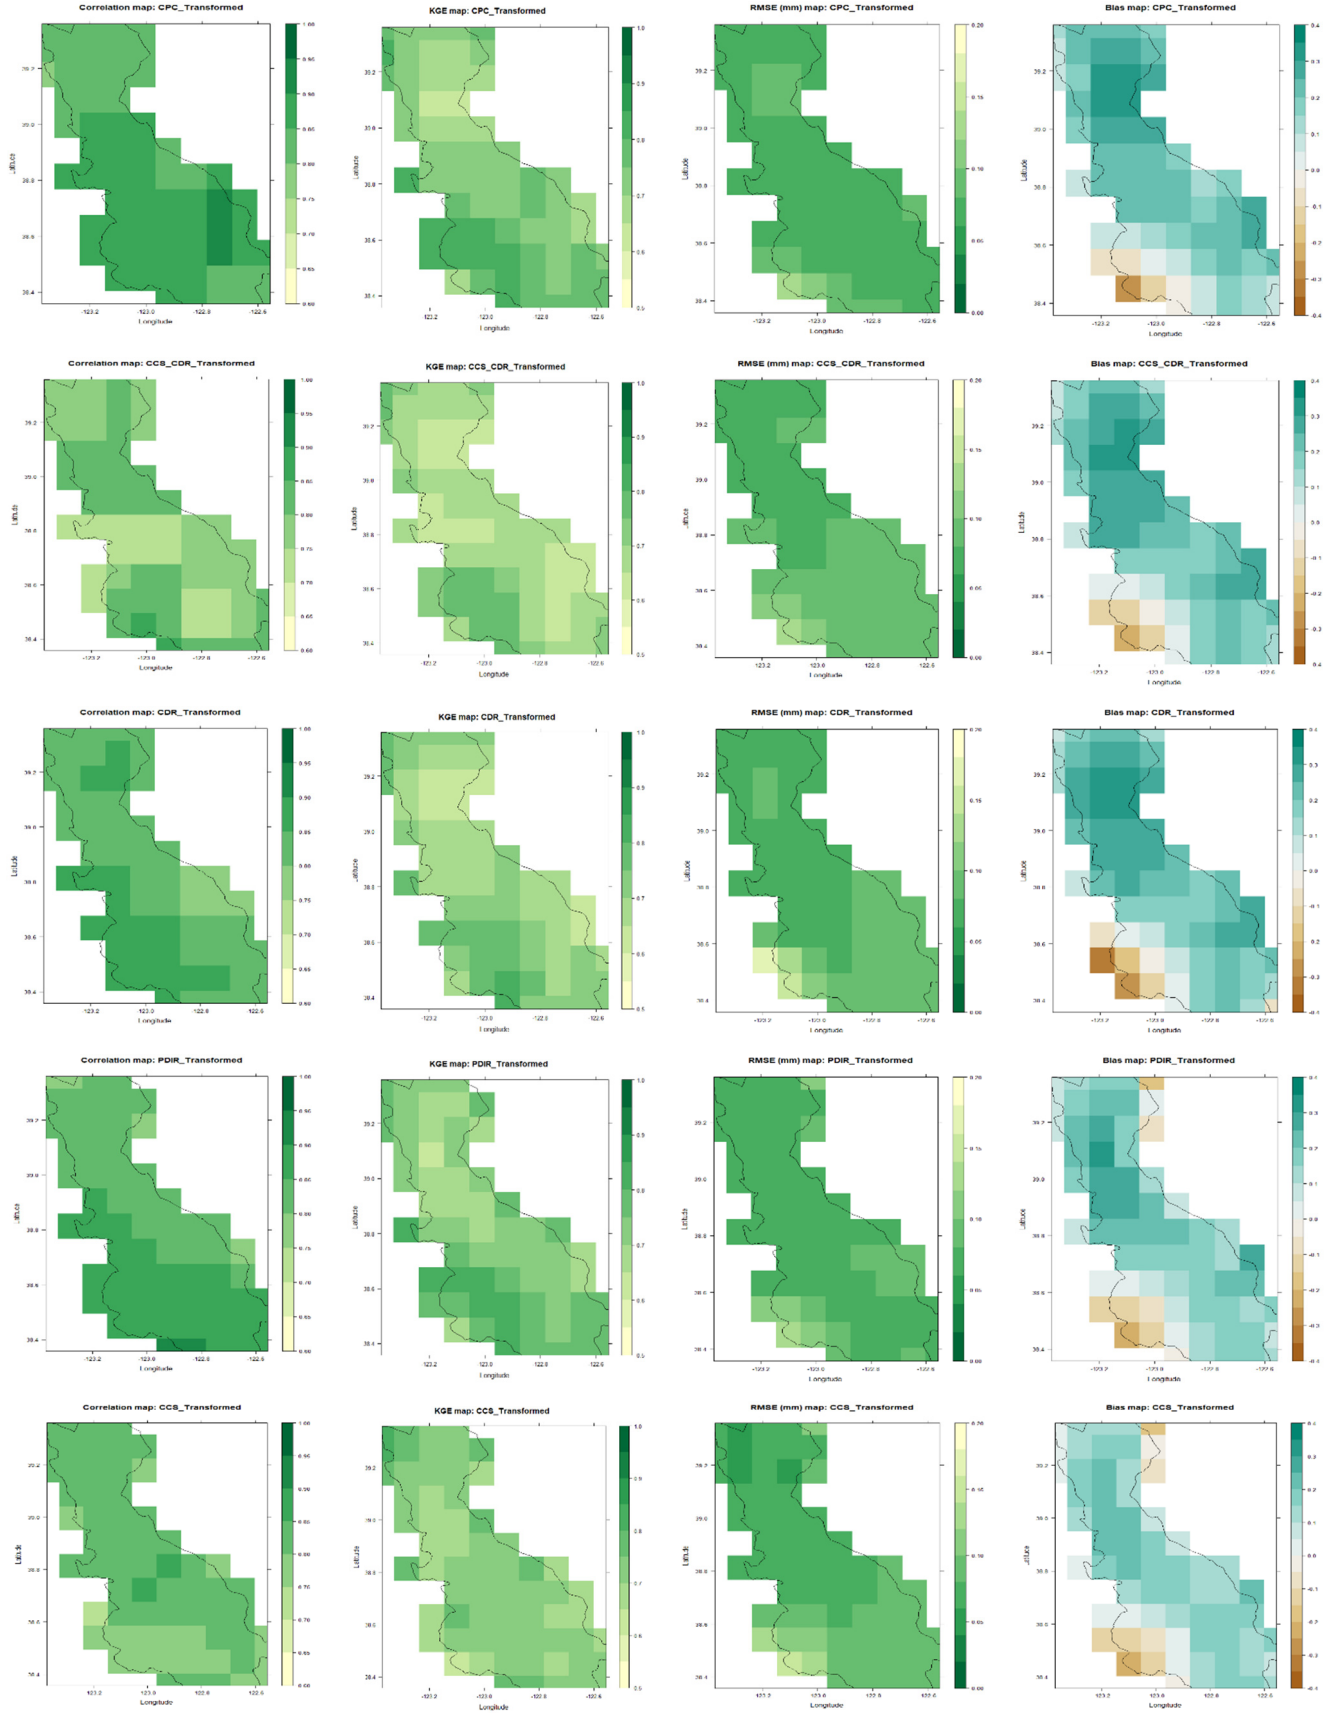

**Figure S8.** CC,  $E_{KGE}$ , RMSE, and Bias (columns 1 to 4) for CPC-T, CCS-CDR-T, CDR-T, PDIR-T, and CCS-T (rows 1 to 5) over the Russian River catchment for soil moisture simulation.
